July 2013

# PSYCHIATRIC SERVICES

A Journal of the  
American Psychiatric  
Association

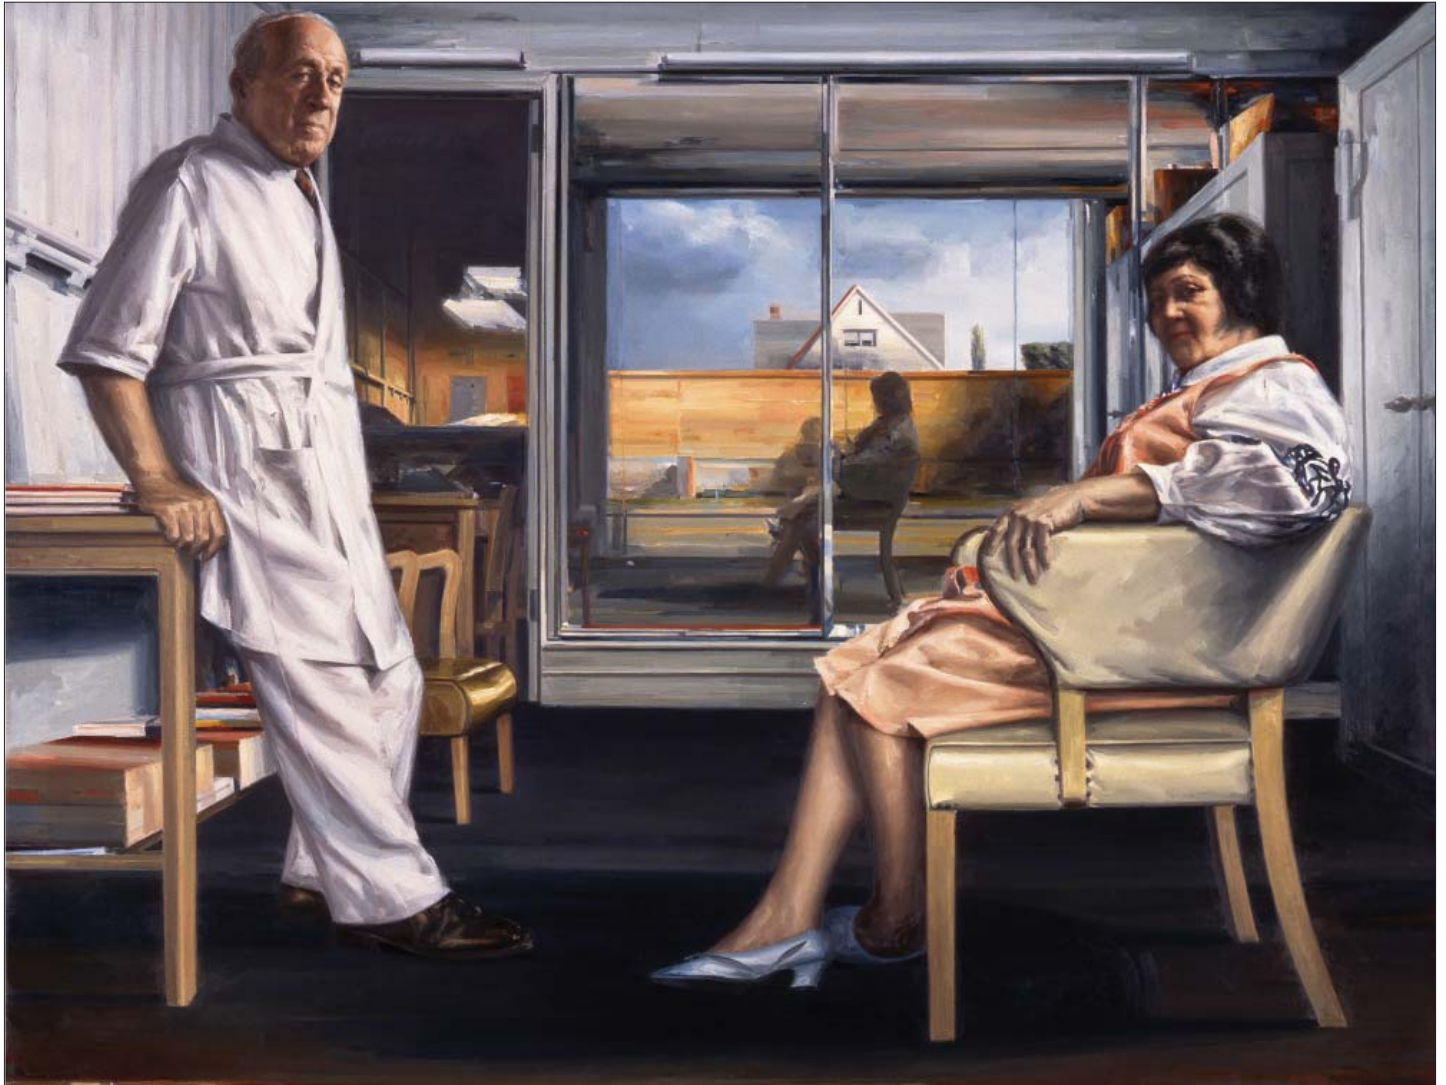

In This Issue: Preliminary Program for the 2013 Insitute on Psychiatric Services

- ◆ Addressing Problems of Homelessness and Suicide Among the Nation's Veterans
- ◆ China and Japan Launch National Plans for Reform of Mental Health Services
- ◆ Integrating Primary Care Into Community Settings: Early Lessons Learned
